# Supplementary material
Source: Springer Nature journal article supplement (https://www.springermedizin.de/resource/supplementary/12936_2014_3304_MOESM4_ESM.pdf/9545554)

## Plateaux Region - 4 districts

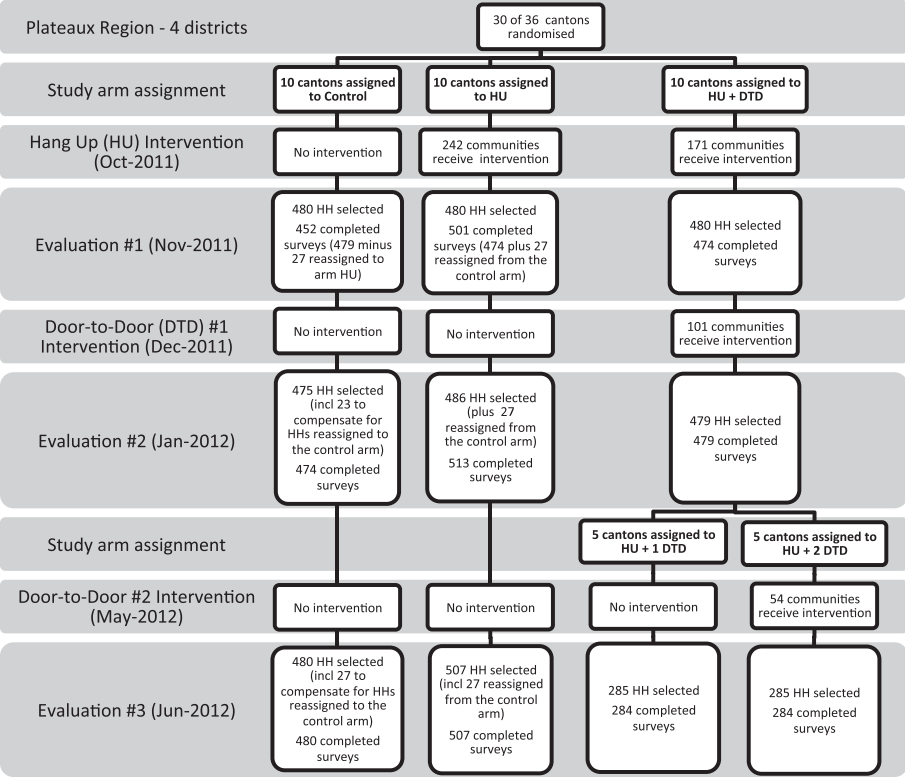

Supplement: MOESM4 [file 9545554]
